# Supplementary material for: Selective coordination with heterogeneous metal atoms for inorganic–organic hybrid layers
Source: Royal Society of Chemistry journal article supplement (doi:10.1039/d0ra09415c), 2021-01-01
Supplement: d0ra09415c1.pdf [file d0ra09415c1.pdf]

**Supporting Information:**

## **Selective coordination with heterogeneous metal atoms for inorganic-organic hybrid layers**

*Seong Jun Kim<sup>1,2</sup>, In Su Jeon<sup>1</sup>, Wooseok Song<sup>1</sup>, Sung Myung<sup>1\*</sup>, Jongsun Lim<sup>1</sup>, Sun Sook Lee<sup>1</sup>, Taek-Mo Chung<sup>1</sup>, & Ki-Seok An<sup>1\*</sup>*

<sup>1</sup>Thin Film Materials Research Center, Korea Research Institute of Chemical Technology (KRICT), Daejeon 34114, Republic of Korea. <sup>2</sup>Graphene Research Lab, Emerging Devices Research Group, Electronics and Telecommunications Research Institute (ETRI), Daejeon 34129, Republic of Korea  
Correspondence and requests for materials should be addressed to S. Myung (email: msung@kRICT.re.kr) and K. An (email: ksan@kRICT.re.kr).

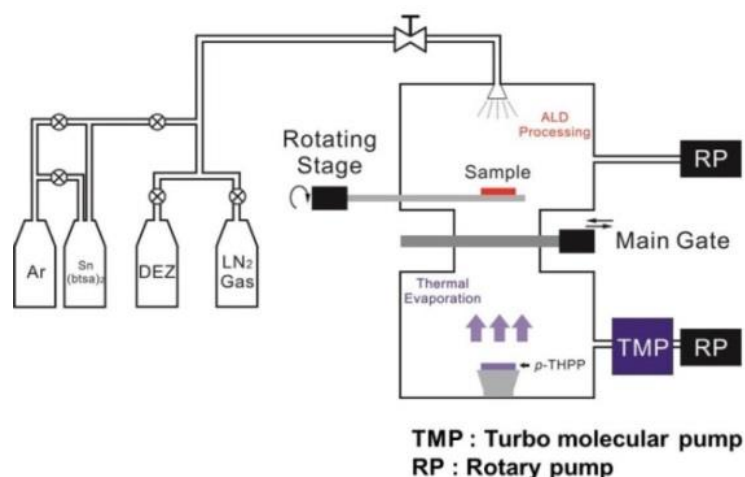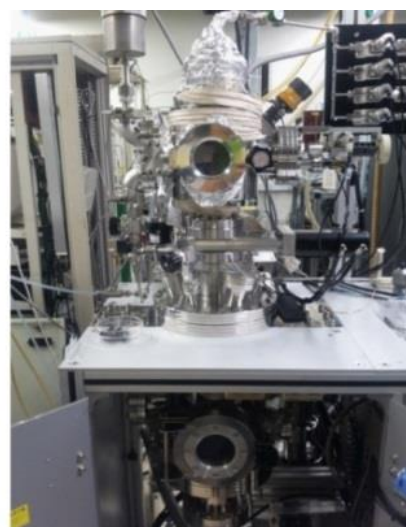

**Fig. S1.** Schematic of the organic-inorganic hybrid deposition system for synthesis of Zn(II)-*p*-THPP-Sn(II) hybrid thin films.

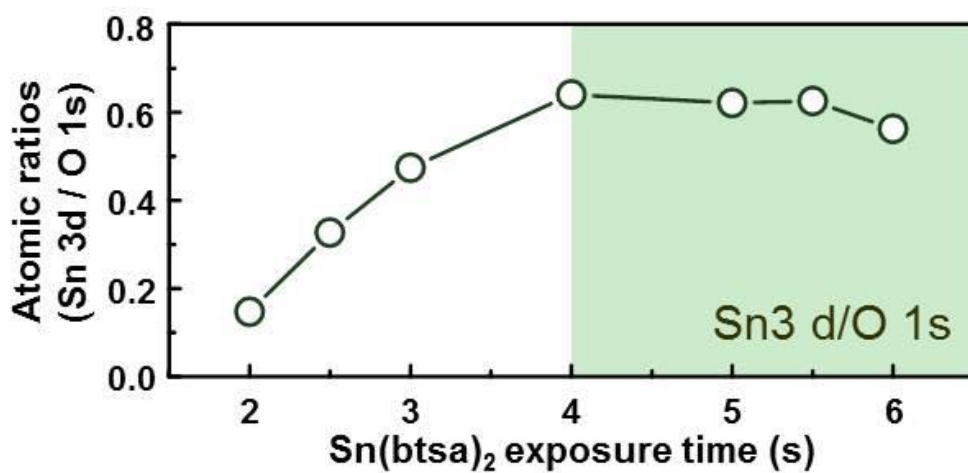

Fig. S2. Plots for the atomic ratios of the Sn 3d to O 1s peaks.

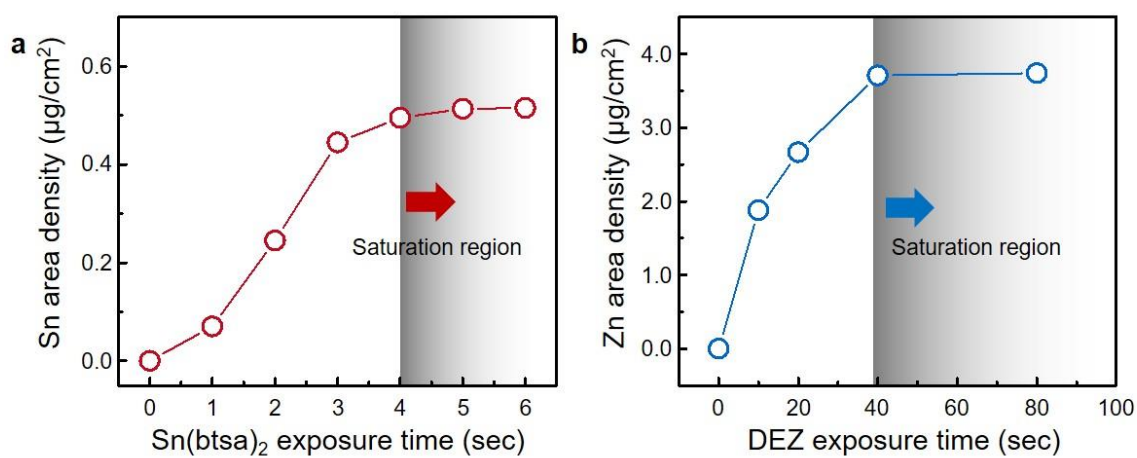

Fig. S3. The area density of (a) Sn and (b) Zn by Sn(btssa)<sub>2</sub> and DEZ precursors exposure time.

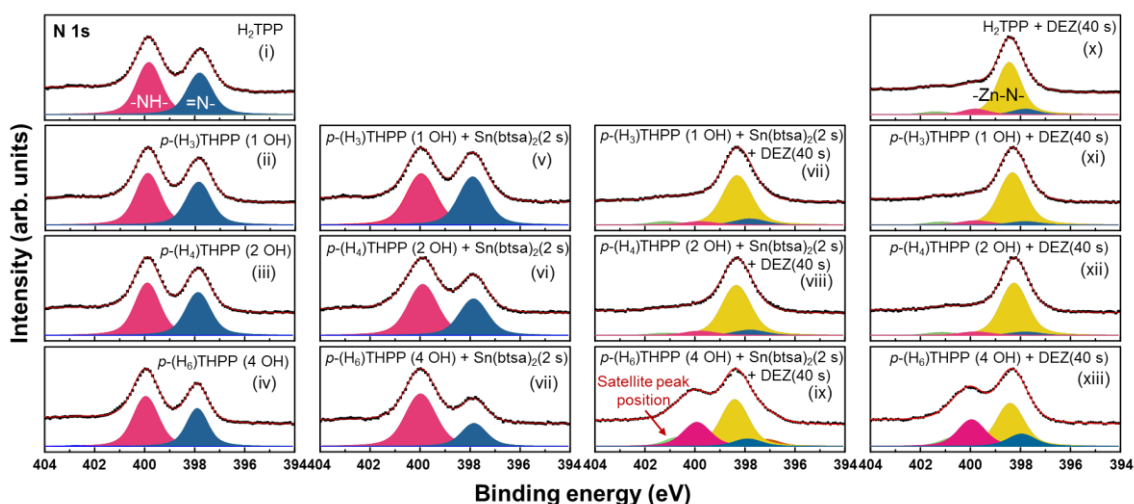

**Fig. S4.** XPS spectra of N 1s core level for (i) H<sub>2</sub>THPP, (ii)-(iv) *p*-(H<sub>6</sub>)THPP thin film, (v)-(vii) *p*-(H<sub>2</sub>)THPP-Sn(II), (vii)-(ix) Zn(II)-*p*-THPP-Sn(II) hybrid thin film, (x) Zn(II)-THPP and (xi)-(xiii) Zn(II)-*p*-THPP hybrid thin films as a function of the number of hydroxyl groups (1 OH, 2 OH and 4 OH) on the phenyl rings of the porphyrin.

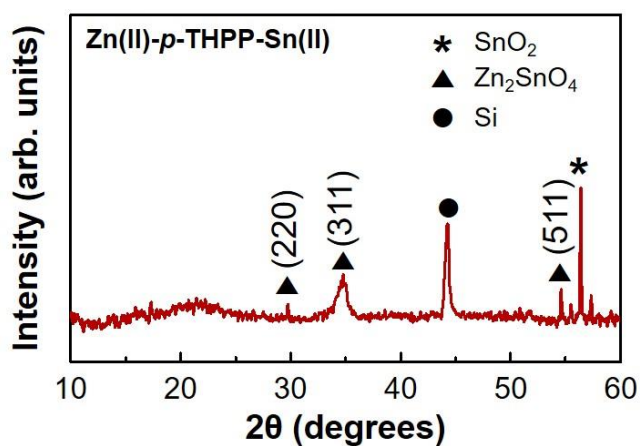

**Fig. S5.** XRD analysis of Zn(II)-*p*-THPP-Sn(II) film.

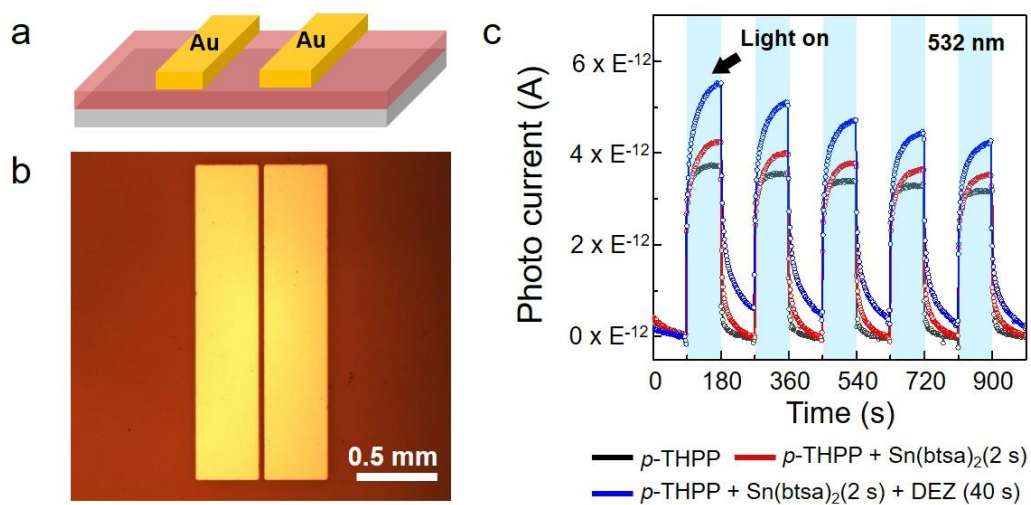

**Fig. S6.** (a) Schematic illustration and (b) an optical image of the *p*-THPP, *p*-THPP-Sn(II) and Zn(II)-*p*-THPP-Sn(II) based devices. (c) The real-time cyclic photocurrent of *p*-THPP thin film (black line), *p*-THPP-Sn(II) (red line) and Zn(II)-*p*-THPP-Sn(II) (blue line) hybrid thin film devices under 532 nm illumination light.
